# Supplementary figures and images for: Sidekick dynamically rebalances contractile and protrusive forces to control tissue morphogenesis
Source: PubMed Central journal article supplement — J Cell Biol. 2022 Mar 8;221(5):e202107035. doi: 10.1083/jcb.202107035 (PMC8908789; doi:10.1083/jcb.202107035), 2022-03-08

# Source data for Figure 4H

GST-Sdk-SdkDBD\_BSA\_1.pdf

3296 x 2472

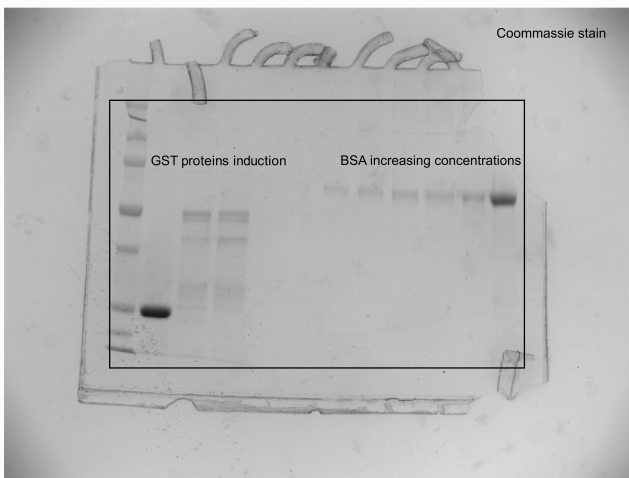

GST-Sdk-SdkDBD\_SCAR pull down\_30sec\_1.pdf

3296 x 2472

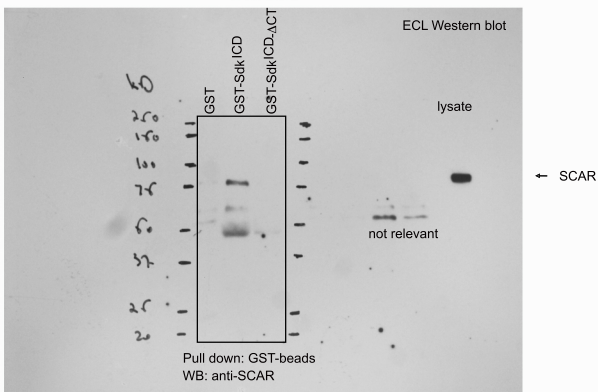

Supplement: JCB_202107035_SourceDataF4.pdf [file JCB_202107035_SourceDataF4.pdf]
